# Supplementary material for: Thermoresponsive behaviour of poly(N,N-diethylacrylamide) in aqueous two-phase systems
Source: Royal Society of Chemistry journal article supplement (doi:10.1039/d3py00734k), 2023-01-01
Supplement: d3py00734k1.pdf [file d3py00734k1.pdf]

## Supporting Information

# Thermoresponsive behaviour of poly(*N,N*-diethylacrylamide) in aqueous two-phase systems

*Niamh Bayliss,<sup>a</sup> Gokhan Yilmaz,<sup>b</sup> Alexander Plucinski,<sup>a</sup> C. Remzi Becer<sup>b</sup> and Bernhard V. K. J. Schmidt<sup>\*a</sup>*

<sup>a</sup> School of Chemistry, University of Glasgow, Glasgow G12 8QQ, UK

<sup>b</sup> Department of Chemistry, University of Warwick, Coventry, CV4 7AL, UK

Email: [bernhard.schmidt@glasgow.ac.uk](mailto:bernhard.schmidt@glasgow.ac.uk)

## Table of Contents

| Section           | Page |
|-------------------|------|
| Polymer synthesis | 2    |
| Polymer analysis  | 3    |
| ATPS formation    | 5    |
| Thermoresponse    | 11   |
| Analysis of A3PS  | 14   |

## Polymer Synthesis:

### RAFT-polymerisation of PDEA<sub>40k</sub>

Destabilised DEA (4.0 g, 31.5 mmol, 788 eq.), EMP (9.0 mg, 0.04 mmol, 1.0 eq.), and DMF (4 mL) were mixed in a vial containing a stirring bar and sealed with a septum. The solution was bubbled with nitrogen for 30 min and the polymerisation was initiated using two visible light LEDs 20 cm apart (50 W Bridgelux BXRA-50C5300;  $\lambda > 410\text{nm}$ , connected to a self-made circuit and cooling system). The polymerisation was stopped after 24 h. Subsequently, the polymer was dialysed against deionised water (Spectra/Por 3500 Da) for 3 days. Finally, the sample was freeze-dried and a slightly yellow solid (2.17 g,  $M_n = 40000 \text{ g}\cdot\text{mol}^{-1}$ ,  $D = 1.26$ ) was obtained.

## Polymer analysis:

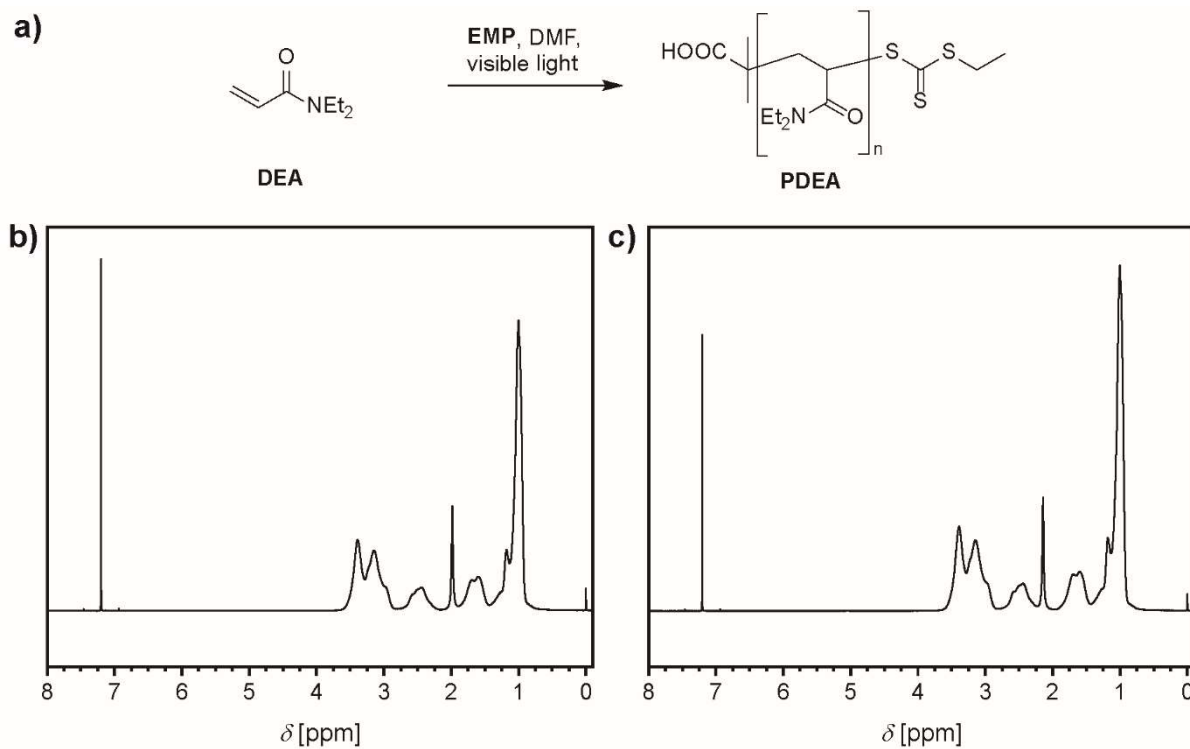

**Figure S1.** a) Reaction scheme of the photo induced RAFT-polymerisation of *N,N*-diethylacrylamide (DEA), b)  $^1\text{H-NMR}$  of PDEA<sub>55k</sub> in  $\text{CDCl}_3$  and c)  $^1\text{H-NMR}$  of PDEA<sub>40k</sub> in  $\text{CDCl}_3$ .

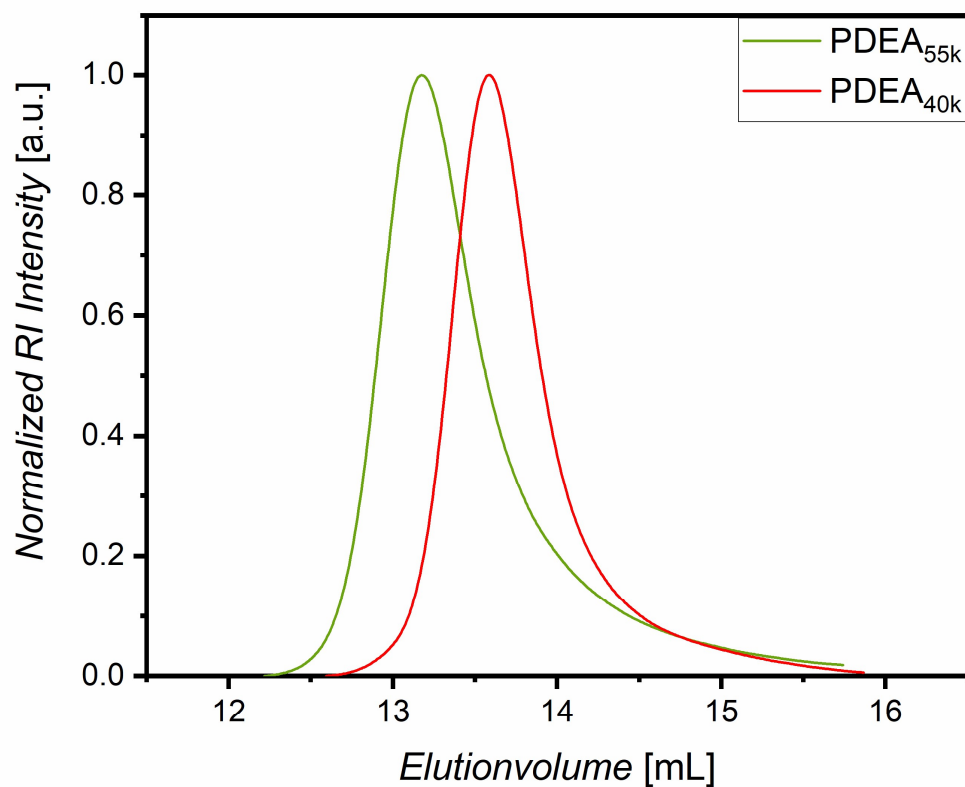

**Figure S2.** Results of SEC of PDEA samples in THF against PS standards.

**Table S1.** Analytical results for PDEA polymers.

| Polymer             | [DEA]/[EMP] | Conversion <sup>a</sup> | $M_{n, \text{theory}} \text{ (g}\cdot\text{mol}^{-1}\text{)}$ | $M_{n, \text{SEC}} \text{ (g}\cdot\text{mol}^{-1}\text{)}$ <sup>b</sup> | $\bar{D}^b$ |
|---------------------|-------------|-------------------------|---------------------------------------------------------------|-------------------------------------------------------------------------|-------------|
| PDMA <sub>40k</sub> | 788         | 60%                     | 60100                                                         | 40000                                                                   | 1.26        |
| PDEA <sub>55k</sub> | 1575        | 81%                     | 162200                                                        | 54800                                                                   | 1.30        |

a) measured via <sup>1</sup>H NMR

b) measured in THF against PS standards

## ATPS formation:

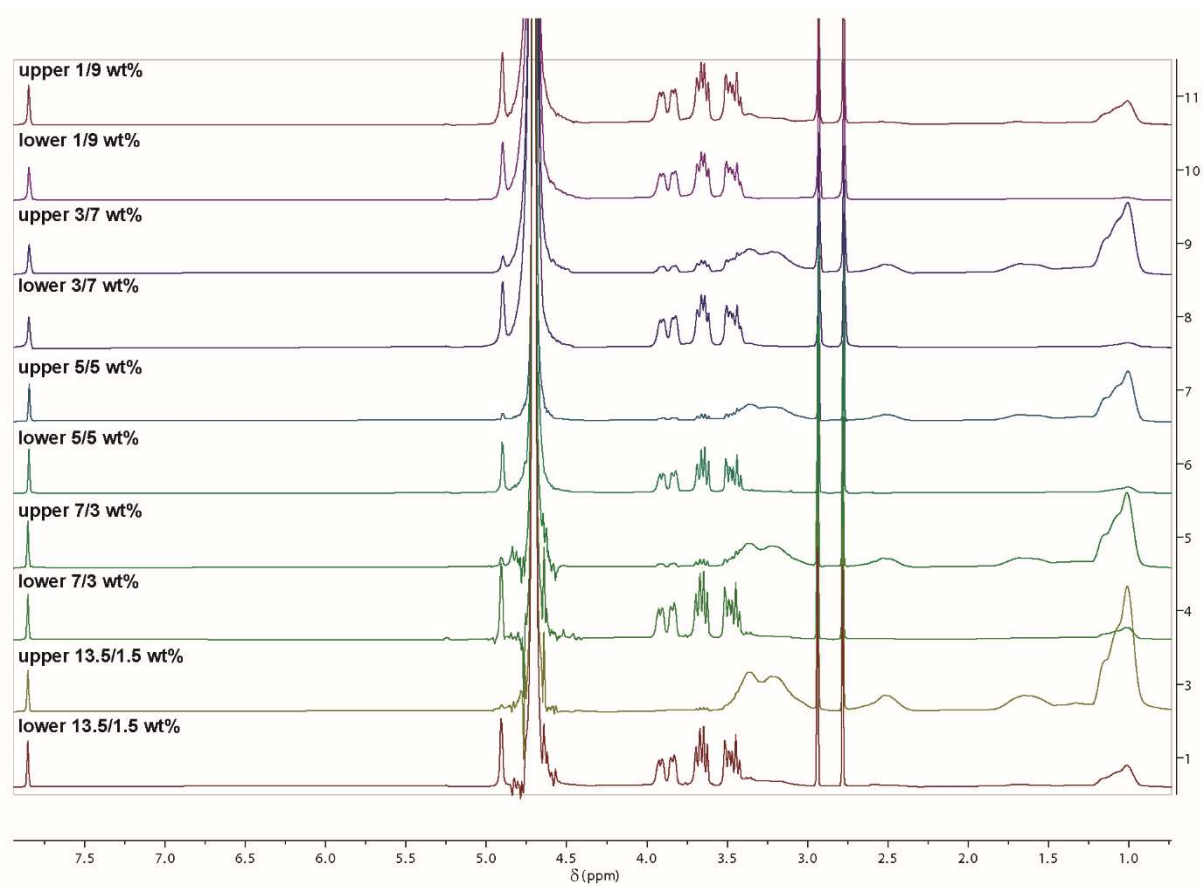

**Figure S3.** <sup>1</sup>H-NMR in D<sub>2</sub>O of the PDEA<sub>55k</sub>/Dex ATPS using DMF as internal standard: 1/9 wt%, 3/7 wt%, 5/5 wt%, 7/3wt% and 13.5/1.5 wt% from top to bottom.

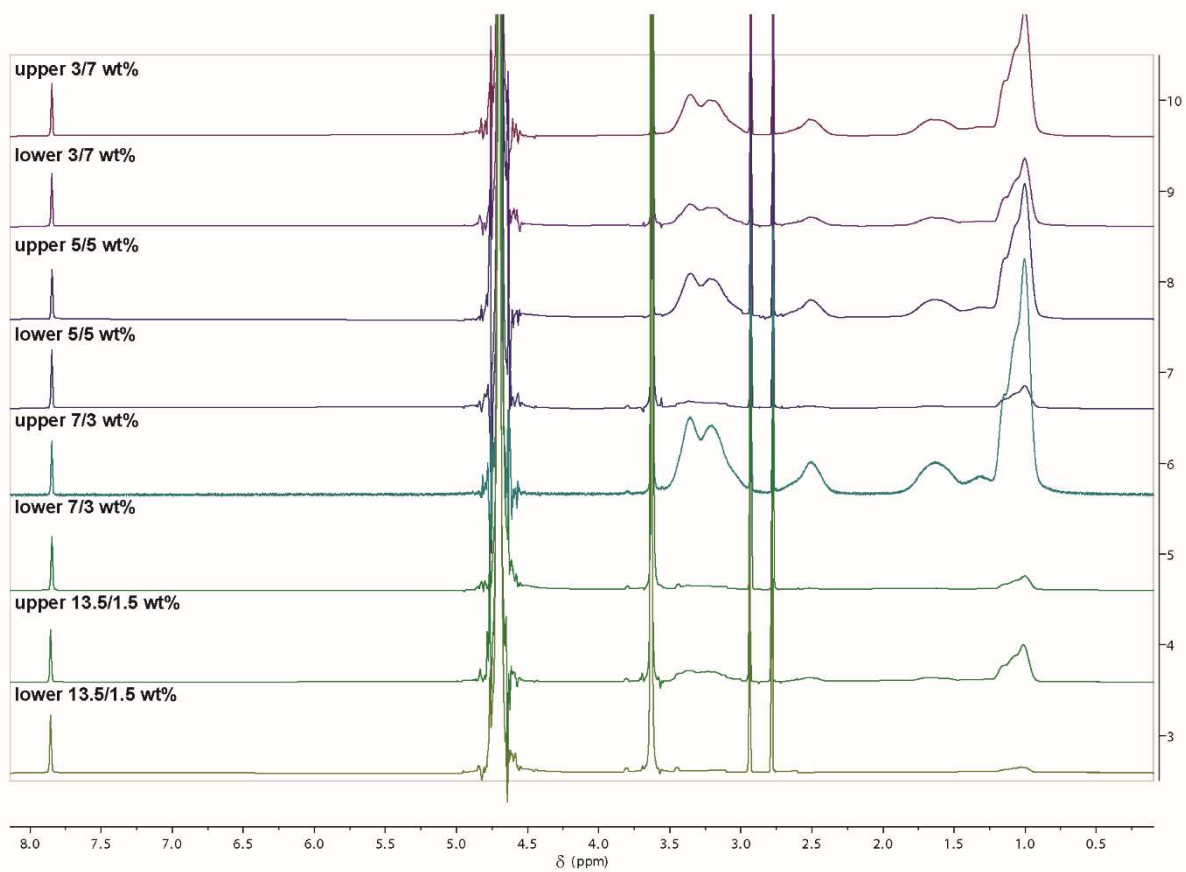

**Figure S4.**  $^1\text{H-NMR}$  in  $\text{D}_2\text{O}$  of the PDEA<sub>55k</sub>/PEG ATPS using DMF as internal standard: 3/7 wt%, 5/5 wt%, 7/3wt% and 13.5/1.5 wt% from top to bottom.

$$P_X = \frac{c_{XL1}}{c_{XL2}}$$

**Equation S1.** For the calculation of the partition coefficient for a polymer X in the ATPS with  $P_X$ -partition coefficient,  $c_{XL1}$ -concentration of the polymer in the upper phase (L1) and  $c_{XL2}$ -concentration of the polymer in the lower phase (L2).

$$F_{X,L_x} = \frac{c_{XL1}}{c_{XL1} + c_{XL2}}$$

**Equation S2.** For the calculation of mole fractions for a polymer X in the A3PS with  $F_{X,L_x}$ -mole fraction,  $c_{XL1}$ -concentration of the polymer in the upper phase (L1) and  $c_{XL2}$ -concentration of the polymer in the middle phase (L2).

**Table S2.** Partition coefficients for PDEA<sub>55k</sub>/Dex systems measured via <sup>1</sup>H NMR.

| [PDEA <sub>55k</sub> ]/[Dex] (wt%/wt%) | $P_{PDEA,upper}$ | $P_{PDEA,lower}$ | $P_{Dex,upper}$ | $P_{Dex,lower}$ |
|----------------------------------------|------------------|------------------|-----------------|-----------------|
| 1/9                                    | 5.19             | 0.19             | 0.74            | 1.35            |
|                                        | (±0.294)         | (±0.011)         | (±0.042)        | (±0.076)        |
| 3/7                                    | 25.25            | 0.04             | 0.23            | 4.39            |
|                                        | (±1.428)         | (±0.002)         | (±0.013)        | (±0.248)        |
| 5/5                                    | 9.45             | 0.11             | 0.30            | 3.38            |
|                                        | (±0.535)         | (±0.006)         | (±0.017)        | (±0.191)        |
| 7/3                                    | 4.36             | 0.23             | 0.14            | 7.28            |
|                                        | (±0.247)         | (±0.013)         | (±0.008)        | (±0.412)        |
| 13.5/1.5                               | 2.90             | 0.35             | 0.15            | 6.52            |
|                                        | (±0.164)         | (±0.020)         | (±0.009)        | (±0.369)        |

**Table S3.** Mole fractions for PDEA<sub>55k</sub>/Dex systems measured via <sup>1</sup>H NMR.

| [PDEA <sub>55k</sub> ]/[Dex] (wt%/wt%) | $F_{\text{PDEA,upper}}$ | $F_{\text{PDEA,lower}}$ | $F_{\text{Dex,upper}}$ | $F_{\text{Dex,lower}}$ |
|----------------------------------------|-------------------------|-------------------------|------------------------|------------------------|
| <b>1/9</b>                             | 0.84                    | 0.16                    | 0.43                   | 0.57                   |
|                                        | (±0.047)                | (±0.009)                | (±0.024)               | (±0.032)               |
| <b>3/7</b>                             | 0.96                    | 0.04                    | 0.19                   | 0.81                   |
|                                        | (±0.054)                | (±0.002)                | (±0.011)               | (±0.046)               |
| <b>5/5</b>                             | 0.90                    | 0.10                    | 0.23                   | 0.77                   |
|                                        | (±0.051)                | (±0.005)                | (±0.013)               | (±0.044)               |
| <b>7/3</b>                             | 0.81                    | 0.19                    | 0.12                   | 0.88                   |
|                                        | (±0.046)                | (±0.011)                | (±0.007)               | (±0.050)               |
| <b>13.5/1.5</b>                        | 0.74                    | 0.26                    | 0.13                   | 0.87                   |
|                                        | (±0.042)                | (±0.015)                | (±0.008)               | (±0.049)               |

**Table S4.** Partition coefficients for PDEA<sub>55k</sub>/PEG systems measured via <sup>1</sup>H NMR.

| [PDEA <sub>55k</sub> ]/[PEG] (wt%/wt%) | $P_{\text{PDEA,upper}}$ | $P_{\text{PDEA,lower}}$ | $P_{\text{PEG,upper}}$ | $P_{\text{PEG,lower}}$ |
|----------------------------------------|-------------------------|-------------------------|------------------------|------------------------|
| <b>3/7</b>                             | 0.16                    | 6.07                    | 1.16                   | 0.86                   |
|                                        | (±0.009)                | (±0.343)                | (±0.132)               | (±0.097)               |
| <b>5/5</b>                             | 0.18                    | 5.41                    | 3.93                   | 0.25                   |
|                                        | (±0.010)                | (±0.306)                | (±0.445)               | (±0.029)               |
| <b>7/3</b>                             | 0.14                    | 7.00                    | 3.87                   | 0.26                   |
|                                        | (±0.008)                | (±0.396)                | (±0.437)               | (±0.029)               |
| <b>13.5/1.5</b>                        | 0.51                    | 1.94                    | 2.32                   | 0.43                   |
|                                        | (±0.029)                | (±0.110)                | (±0.263)               | (±0.049)               |



**Table S5.** Mole fractions for PDEA<sub>55k</sub>/PEG systems measured via <sup>1</sup>H NMR.

| [PDEA <sub>55k</sub> ]/[PEG] (wt%/wt%) | $F_{\text{PDEA,upper}}$ | $F_{\text{PDEA,lower}}$ | $F_{\text{PEG,upper}}$ | $F_{\text{PEG,lower}}$ |
|----------------------------------------|-------------------------|-------------------------|------------------------|------------------------|
| <b>3/7</b>                             | 0.14<br>(±0.008)        | 0.86<br>(±0.049)        | 0.54<br>(±0.061)       | 0.46<br>(±0.052)       |
| <b>5/5</b>                             | 0.16<br>(±0.009)        | 0.84<br>(±0.048)        | 0.80<br>(±0.090)       | 0.20<br>(±0.023)       |
| <b>7/3</b>                             | 0.12<br>(±0.007)        | 0.88<br>(±0.049)        | 0.79<br>(±0.090)       | 0.21<br>(±0.023)       |
| <b>13.5/1.5</b>                        | 0.34<br>(±0.019)        | 0.66<br>(±0.037)        | 0.70<br>(±0.079)       | 0.30<br>(±0.034)       |

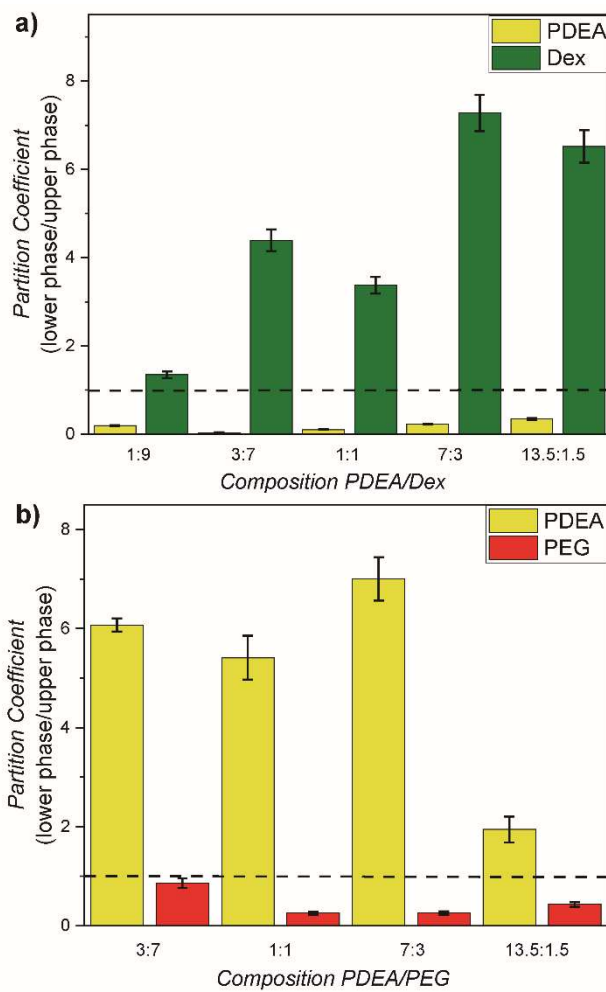

**Figure S5.** Partition coefficients after phase separation (lower phase/upper phase), detected *via*  $^1\text{H}$ -NMR in  $\text{D}_2\text{O}$  using DMF as internal standard: a) PDEA<sub>55k</sub> and Dex; b) PDEA<sub>55k</sub> and PEG.

## Thermoresponse:

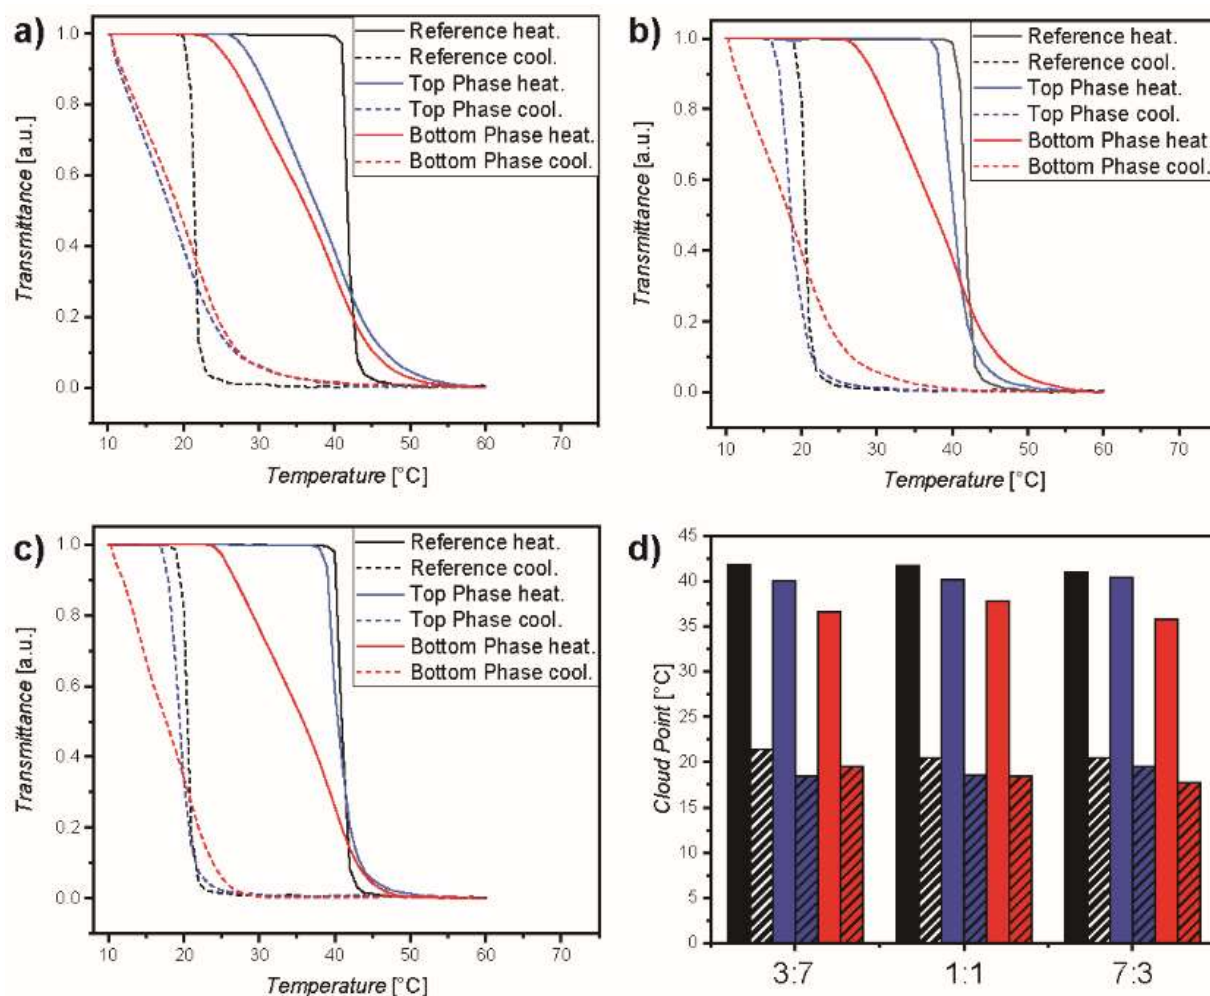

**Figure S6.** Thermoresponse of PDEA<sub>55k</sub>/Dex ATPS (heating rate 2 °C min<sup>-1</sup>): a) turbidimetry results of PDEA<sub>55k</sub>/Dex 3 wt%/7 wt% (reference PDEA<sub>55k</sub> in water at 3 wt%), b) turbidimetry results of PDEA<sub>55k</sub>/Dex 5 wt%/5 wt% (reference PDEA<sub>55k</sub> in water at 5 wt%), c) turbidimetry results of PDEA<sub>55k</sub>/Dex 7 wt%/3 wt% (reference PDEA<sub>55k</sub> in water at 7 wt%) and d) cloud points for various compositions of PDEA<sub>55k</sub>/Dex ATPS (solid: heating, shaded: cooling; black: reference at the respective concentration in water, blue: top phase, red: bottom phase).

**Table S6.** Cloud points for the systems PDEA<sub>40k</sub>/Dex and PDEA<sub>55k</sub>/Dex (reference measured at the same concentration as in ATPS, heating rate 2 °C min<sup>-1</sup>).

| [PDEA <sub>40k</sub> ]/[Dex]<br>(wt%/wt%) | $T_{c,reference\ heat.}$<br>[°C] | $T_{c,reference\ cool.}$<br>[°C] | $T_{c,upper\ heat.}$<br>[°C] | $T_{c,upper\ cool.}$<br>[°C] | $T_{c,lower\ heat.}$<br>[°C] | $T_{c,upper\ cool.}$<br>[°C] |
|-------------------------------------------|----------------------------------|----------------------------------|------------------------------|------------------------------|------------------------------|------------------------------|
| 3/7                                       | 40.9                             | 21.4                             | 34.8                         | 18.8                         | 36.9                         | 18.1                         |
| 5/5                                       | 41.2                             | 20.5                             | 40.5                         | 23.7                         | 35.5                         | 17.4                         |
| 7/3                                       | 41.5                             | 21.4                             | 38.7                         | 22.7                         | 37.7                         | 20.8                         |
| [PDEA <sub>55k</sub> ]/[Dex]<br>(wt%/wt%) | $T_{c,reference\ heat.}$<br>[°C] | $T_{c,reference\ cool.}$<br>[°C] | $T_{c,upper\ heat.}$<br>[°C] | $T_{c,upper\ cool.}$<br>[°C] | $T_{c,lower\ heat.}$<br>[°C] | $T_{c,upper\ cool.}$<br>[°C] |
| 3/7                                       | 41.8                             | 21.4                             | 40.0                         | 18.4                         | 36.6                         | 19.5                         |
| 5/5                                       | 41.7                             | 20.5                             | 40.2                         | 18.6                         | 37.8                         | 18.4                         |
| 7/3                                       | 41.0                             | 20.5                             | 40.4                         | 19.5                         | 35.8                         | 17.7                         |

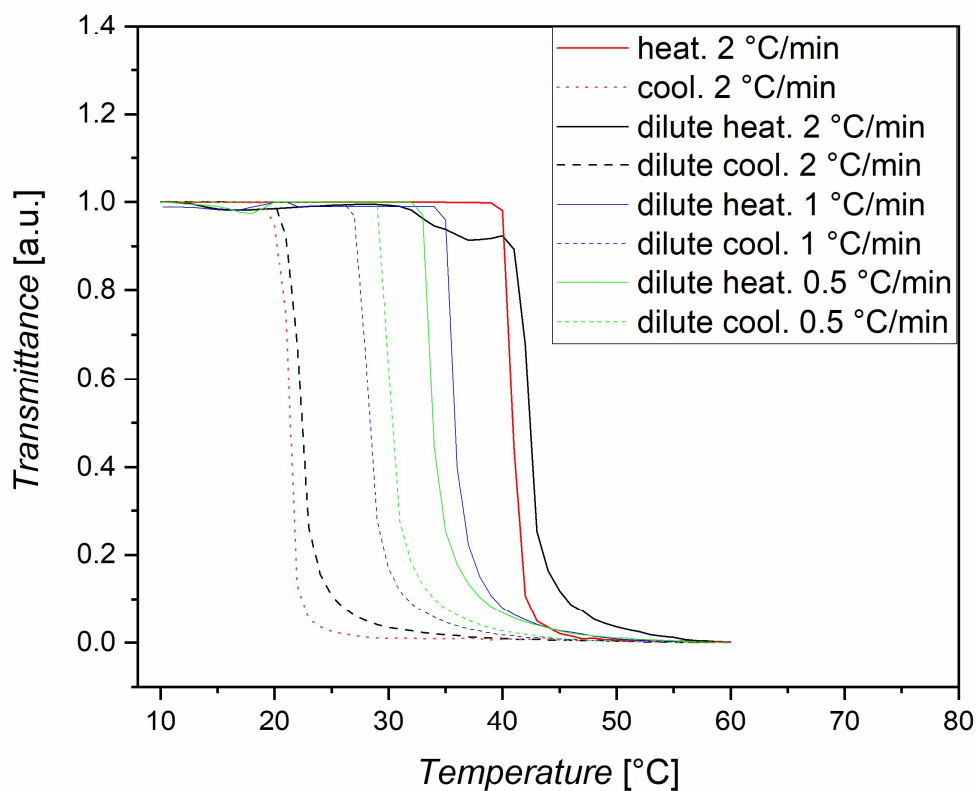

**Figure S7.** Thermoresponse of PDEA<sub>40k</sub> in water (solid curves heating, dashed curves cooling) at a concentration of 0.5 wt% with heating rate of 2 °C min<sup>-1</sup> (black curves), 0.5 wt% with heating rate of 1 °C min<sup>-1</sup> (blue curves), 0.5 wt% with heating rate of 0.5 °C min<sup>-1</sup> (green curves) and 3 wt% with heating rate of 2 °C min<sup>-1</sup> (red curves).

### Analysis of A3PS:

$$P_{X,L1-L2} = \frac{c_{XL1}}{c_{XL2}} \quad P_{X,L2-L3} = \frac{c_{XL2}}{c_{XL3}} \quad P_{X,L1-L3} = \frac{c_{XL1}}{c_{XL3}}$$

**Equation S3.** For the calculation of the partition coefficient for a polymer X in the A3PS with  $P_{X,Lx-Ly}$ -partition coefficient,  $c_{XL1}$ -concentration of the polymer in the upper phase (L1),  $c_{XL2}$ -concentration of the polymer in the middle phase (L2) and  $c_{XL3}$ -concentration of the polymer in the lower phase (L3).

$$F_{X,Lx} = \frac{c_{XL1}}{c_{XL1} + c_{XL2} + c_{XL3}}$$

**Equation S4.** For the calculation of mole fractions for a polymer X in the A3PS with  $F_{X,Lx}$ -mole fraction,  $c_{XL1}$ -concentration of the polymer in the upper phase (L1),  $c_{XL2}$ -concentration of the polymer in the middle phase (L2) and  $c_{XL3}$ -concentration of the polymer in the lower phase (L3).

**Table S7.** Partition coefficients for PDEA<sub>40k</sub>/Dex/PEG (5/5/5 wt%) system measured via <sup>1</sup>H NMR.

|                                |                      |
|--------------------------------|----------------------|
| $P_{\text{PDEA,upper-middle}}$ | 0.23 ( $\pm 0.013$ ) |
| $P_{\text{PDEA,middle-lower}}$ | 8.07 ( $\pm 0.457$ ) |
| $P_{\text{PDEA,upper-lower}}$  | 1.87 ( $\pm 0.106$ ) |
| $P_{\text{Dex,upper-middle}}$  | 0.14 ( $\pm 0.005$ ) |
| $P_{\text{Dex,middle-lower}}$  | 1.04 ( $\pm 0.042$ ) |
| $P_{\text{Dex,upper-lower}}$   | 0.14 ( $\pm 0.008$ ) |
| $P_{\text{PEG,upper-middle}}$  | 4.97 ( $\pm 0.281$ ) |
| $P_{\text{PEG,middle-lower}}$  | 0.20 ( $\pm 0.011$ ) |
| $P_{\text{PEG,upper-lower}}$   | 8.14 ( $\pm 0.461$ ) |

**Table S8.** Mole fractions for PDEA<sub>40k</sub>/Dex/PEG (5/5/5 wt%) system measured via <sup>1</sup>H NMR.

|                          |                      |
|--------------------------|----------------------|
| $F_{\text{PDEA,upper}}$  | 0.17 ( $\pm 0.010$ ) |
| $F_{\text{PDEA,middle}}$ | 0.74 ( $\pm 0.042$ ) |
| $F_{\text{PDEA,lower}}$  | 0.09 ( $\pm 0.005$ ) |
| $F_{\text{Dex,upper}}$   | 0.07 ( $\pm 0.003$ ) |
| $F_{\text{Dex,middle}}$  | 0.48 ( $\pm 0.027$ ) |
| $F_{\text{Dex,lower}}$   | 0.46 ( $\pm 0.026$ ) |
| $F_{\text{PEG,upper}}$   | 0.76 ( $\pm 0.043$ ) |
| $F_{\text{PEG,middle}}$  | 0.15 ( $\pm 0.009$ ) |
| $F_{\text{PEG,lower}}$   | 0.09 ( $\pm 0.005$ ) |

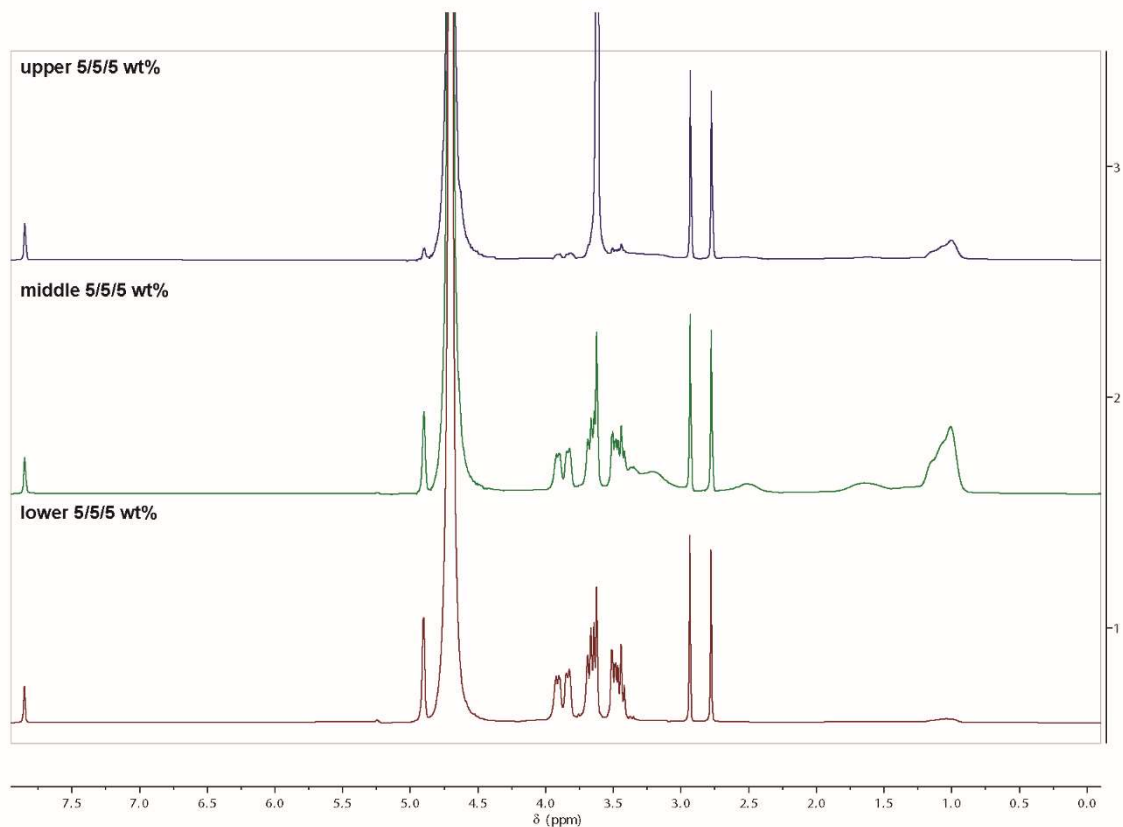

**Figure S8.**  $^1\text{H}$ -NMR in  $\text{D}_2\text{O}$  of the  $\text{PDEA}_{55\text{k}}/\text{Dex}/\text{PEG}$  A3PS using DMF as internal standard (5/5/5 wt%).

**Table S9.** Cloud points for the system  $\text{PDEA}_{40\text{k}}/\text{Dex}/\text{PEG}$  (5/5/5 wt%) (reference measured at the same concentration as in A3PS, heating rate  $2\text{ }^\circ\text{C min}^{-1}$ ).

| $T_{\text{c,ref. heat.}}$ | $T_{\text{c,ref. cool.}}$ | $T_{\text{c,upper heat.}}$ | $T_{\text{c,upper cool.}}$ | $T_{\text{c,middle heat.}}$ | $T_{\text{c,middle cool.}}$ | $T_{\text{c,lower heat.}}$ | $T_{\text{c,upper cool.}}$ |
|---------------------------|---------------------------|----------------------------|----------------------------|-----------------------------|-----------------------------|----------------------------|----------------------------|
| [ $^\circ\text{C}$ ]      | [ $^\circ\text{C}$ ]      | [ $^\circ\text{C}$ ]       | [ $^\circ\text{C}$ ]       | [ $^\circ\text{C}$ ]        | [ $^\circ\text{C}$ ]        | [ $^\circ\text{C}$ ]       | [ $^\circ\text{C}$ ]       |
| 41.3                      | 20.5                      | 26.6                       | 13.4                       | 27.9                        | 16.8                        | 45.4                       | 26.1                       |
